# Supplementary material for: A case study in the functional consequences of scaling the sizes of realistic cortical models
Source: PLoS Comput Biol. 2019 Jul 23;15(7):e1007198. doi: 10.1371/journal.pcbi.1007198 (PMC6677387; doi:10.1371/journal.pcbi.1007198)
Supplement: S9 Dataset — Contains data for row 1, column 0 of Fig 2. (CSV) [file pcbi.1007198.s009.csv]

orientation (deg)	sf 0.5	sf 1.25	sf 2	sf 2.5	sf 3	sf 4	sf 6	sf 10
0.0	14.272000000000004	27.114666666666665	41.74933333333334	47.06133333333332	43.98933333333333	22.4	11.583999999999996	5.119999999999999
22.5	13.354666666666665	21.461333333333325	31.85066666666666	34.922666666666665	30.293333333333326	17.25866666666667	8.149333333333335	5.077333333333335
45.0	12.096000000000004	14.549333333333328	18.495999999999995	17.365333333333336	14.912000000000004	13.376000000000005	11.861333333333338	5.354666666666667
67.5	11.754666666666665	11.968000000000002	12.864	12.94933333333334	12.416000000000007	17.343999999999994	15.936	4.992000000000001
90.0	11.520000000000003	10.090666666666666	13.888000000000005	13.546666666666669	14.272000000000004	16.021333333333327	10.240000000000002	5.184000000000001
112.5	11.626666666666665	12.992	13.354666666666668	13.525333333333334	13.674666666666669	18.197333333333333	16.085333333333324	5.269333333333332
135.0	13.397333333333336	16.0	18.96533333333334	16.682666666666663	14.293333333333333	13.845333333333329	12.159999999999997	5.077333333333334
157.5	13.76	22.08	33.49333333333333	36.778666666666666	33.32266666666669	17.898666666666667	8.853333333333332	5.760000000000001
