# Supplementary material for: A case study in the functional consequences of scaling the sizes of realistic cortical models
Source: PLoS Comput Biol. 2019 Jul 23;15(7):e1007198. doi: 10.1371/journal.pcbi.1007198 (PMC6677387; doi:10.1371/journal.pcbi.1007198)
Supplement: S18 Dataset — Contains data for row 2, column 4 of Fig 2. (CSV) [file pcbi.1007198.s018.csv]

orientation (deg)	sf 0.5	sf 1.25	sf 2	sf 2.5	sf 3	sf 4	sf 6	sf 10
0.0	13.120000000000001	13.680000000000001	14.239999999999998	12.72	11.200000000000001	13.680000000000001	6.640000000000001	3.12
22.5	13.520000000000001	16.799999999999997	18.720000000000002	16.24	12.639999999999999	10.879999999999999	7.4399999999999995	4.08
45.0	15.120000000000001	23.04	28.799999999999994	27.520000000000003	23.839999999999996	19.36	7.44	4.0
67.5	16.64	27.68	39.120000000000005	39.83999999999999	37.12000000000001	23.92	8.959999999999999	3.5199999999999996
90.0	16.240000000000002	31.04	42.32000000000001	44.96000000000001	40.64	31.759999999999998	14.88	3.5200000000000005
112.5	15.2	27.120000000000005	37.760000000000005	39.92	36.8	26.4	7.919999999999999	3.44
135.0	13.6	20.080000000000002	26.880000000000003	24.96	21.999999999999996	17.36	6.640000000000001	3.28
157.5	13.36	15.52	19.839999999999996	17.36	12.399999999999997	11.6	7.279999999999999	3.2
