# Supplementary material for: A case study in the functional consequences of scaling the sizes of realistic cortical models
Source: PLoS Comput Biol. 2019 Jul 23;15(7):e1007198. doi: 10.1371/journal.pcbi.1007198 (PMC6677387; doi:10.1371/journal.pcbi.1007198)
Supplement: S23 Dataset — Contains data for row 3, column 4 of Fig 2. (CSV) [file pcbi.1007198.s023.csv]

orientation (deg)	sf 0.5	sf 1.25	sf 2	sf 2.5	sf 3	sf 4	sf 6	sf 10
0.0	28.0	24.0	27.46666666666667	23.46666666666667	20.26666666666667	20.0	9.333333333333334	5.066666666666667
22.5	26.400000000000006	27.2	23.73333333333333	22.933333333333326	20.0	16.266666666666666	11.200000000000001	7.466666666666666
45.0	24.53333333333333	27.46666666666667	24.53333333333333	24.799999999999997	26.666666666666668	22.666666666666668	9.066666666666668	5.6000000000000005
67.5	26.666666666666668	29.33333333333333	38.93333333333334	40.53333333333334	45.86666666666667	37.333333333333336	10.133333333333335	5.6000000000000005
90.0	24.266666666666666	28.8	43.46666666666667	53.06666666666667	52.800000000000004	44.800000000000004	14.133333333333333	6.133333333333334
112.5	23.733333333333334	26.133333333333336	39.2	48.53333333333334	51.73333333333333	36.0	10.666666666666666	7.2
135.0	25.333333333333332	25.333333333333332	26.400000000000002	30.13333333333333	31.2	21.599999999999998	12.799999999999999	7.466666666666666
157.5	25.066666666666666	22.400000000000002	21.066666666666666	21.599999999999998	22.13333333333333	17.333333333333332	13.6	5.333333333333333
